# Supplementary material for: Co-stimulation with opposing macrophage polarization cues leads to orthogonal secretion programs in individual cells
Source: PubMed Central journal article supplement (PMC7804107; doi:10.1038/s41467-020-20540-2), 2021-01-12
Supplement: 41467_2020_20540_MOESM1_ESM.pdf [file 41467_2020_20540_MOESM1_ESM.pdf]

**Co-stimulation with opposing macrophage polarization cues leads to orthogonal secretion programs in individual cells**

Muñoz-Rojas *et al.*

Supplementary Information

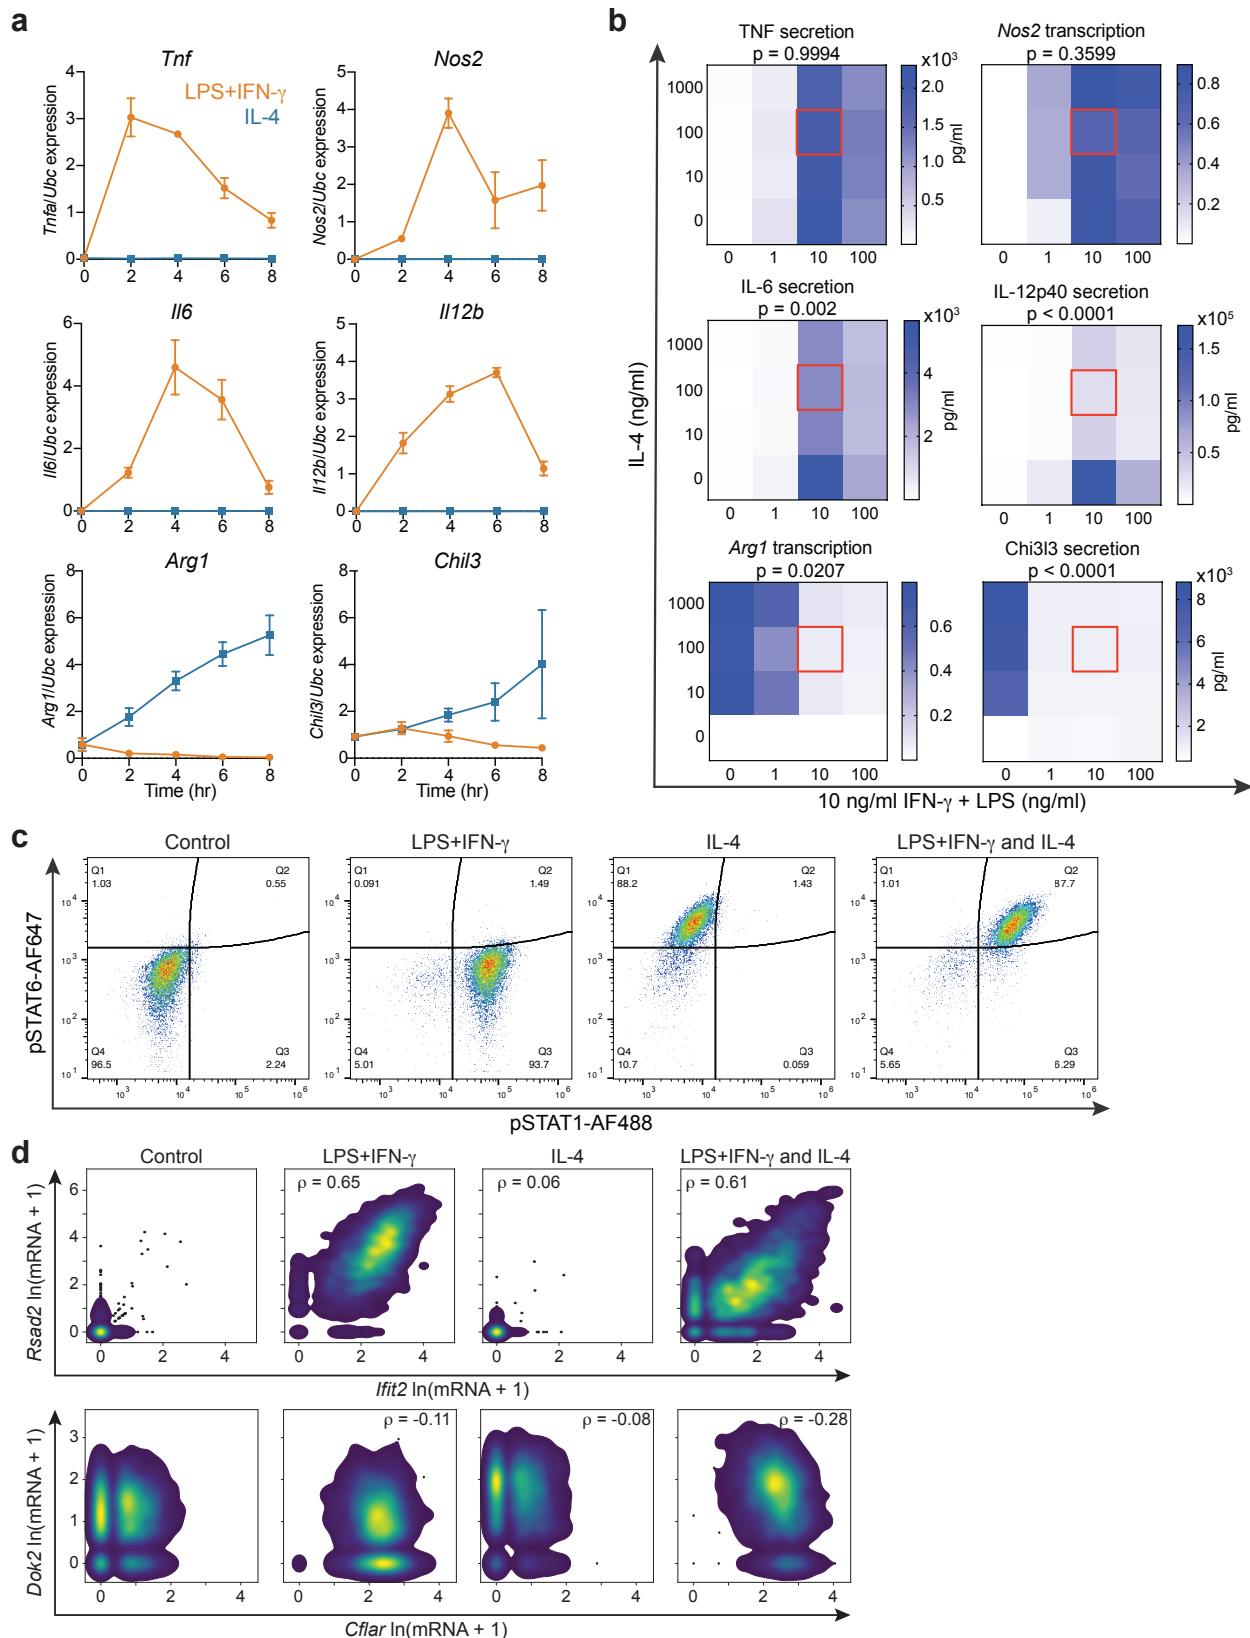

**Supplementary Fig. 1 (associated with Fig. 1). Timing and dose dependence of cross-inhibition between LPS+IFN- $\gamma$  and IL-4 responses in BMDMs.** **a** Time course of transcription in BMDMs after stimulation with 10 ng/ml LPS+10 ng/ml IFN- $\gamma$  or 100 ng/ml IL-4 for selected targets measured by RT-qPCR (mean  $\pm$  SEM, n=3 biological replicates). **b** Heatmaps of response in BMDMs after stimulation for 24 h with 10 ng/ml IFN- $\gamma$  + a range of LPS doses combined with a range of doses of IL-4. Data represent *Arg1* and *Nos2* transcript levels measured by RT-qPCR and *Chi3l3*, IL-6, IL-12p40, and TNF protein levels measured by ELISA (mean, n=3 biological replicates). *P*-value represents the significance of the interaction between the stimulations calculated by a 2-way ANOVA. **c** Phospho-Stat1 and phospho-Stat6 expression by flow cytometry in BMDMs after stimulation with 10 ng/ml LPS+10 ng/ml IFN- $\gamma$ , 100 ng/ml IL-4, or the combination for 30 min. **d** Density scatter plots of scRNA-seq transcript counts across individual cells for *Rsad2* vs. *Ifit2* (top) and *Dok2* vs. *Cflar* (bottom).  $\rho$  indicates Spearman correlation coefficient. Gene expression is shown as  $\ln(\text{transcript count} + 1)$ . Source data are provided as a Source Data file.

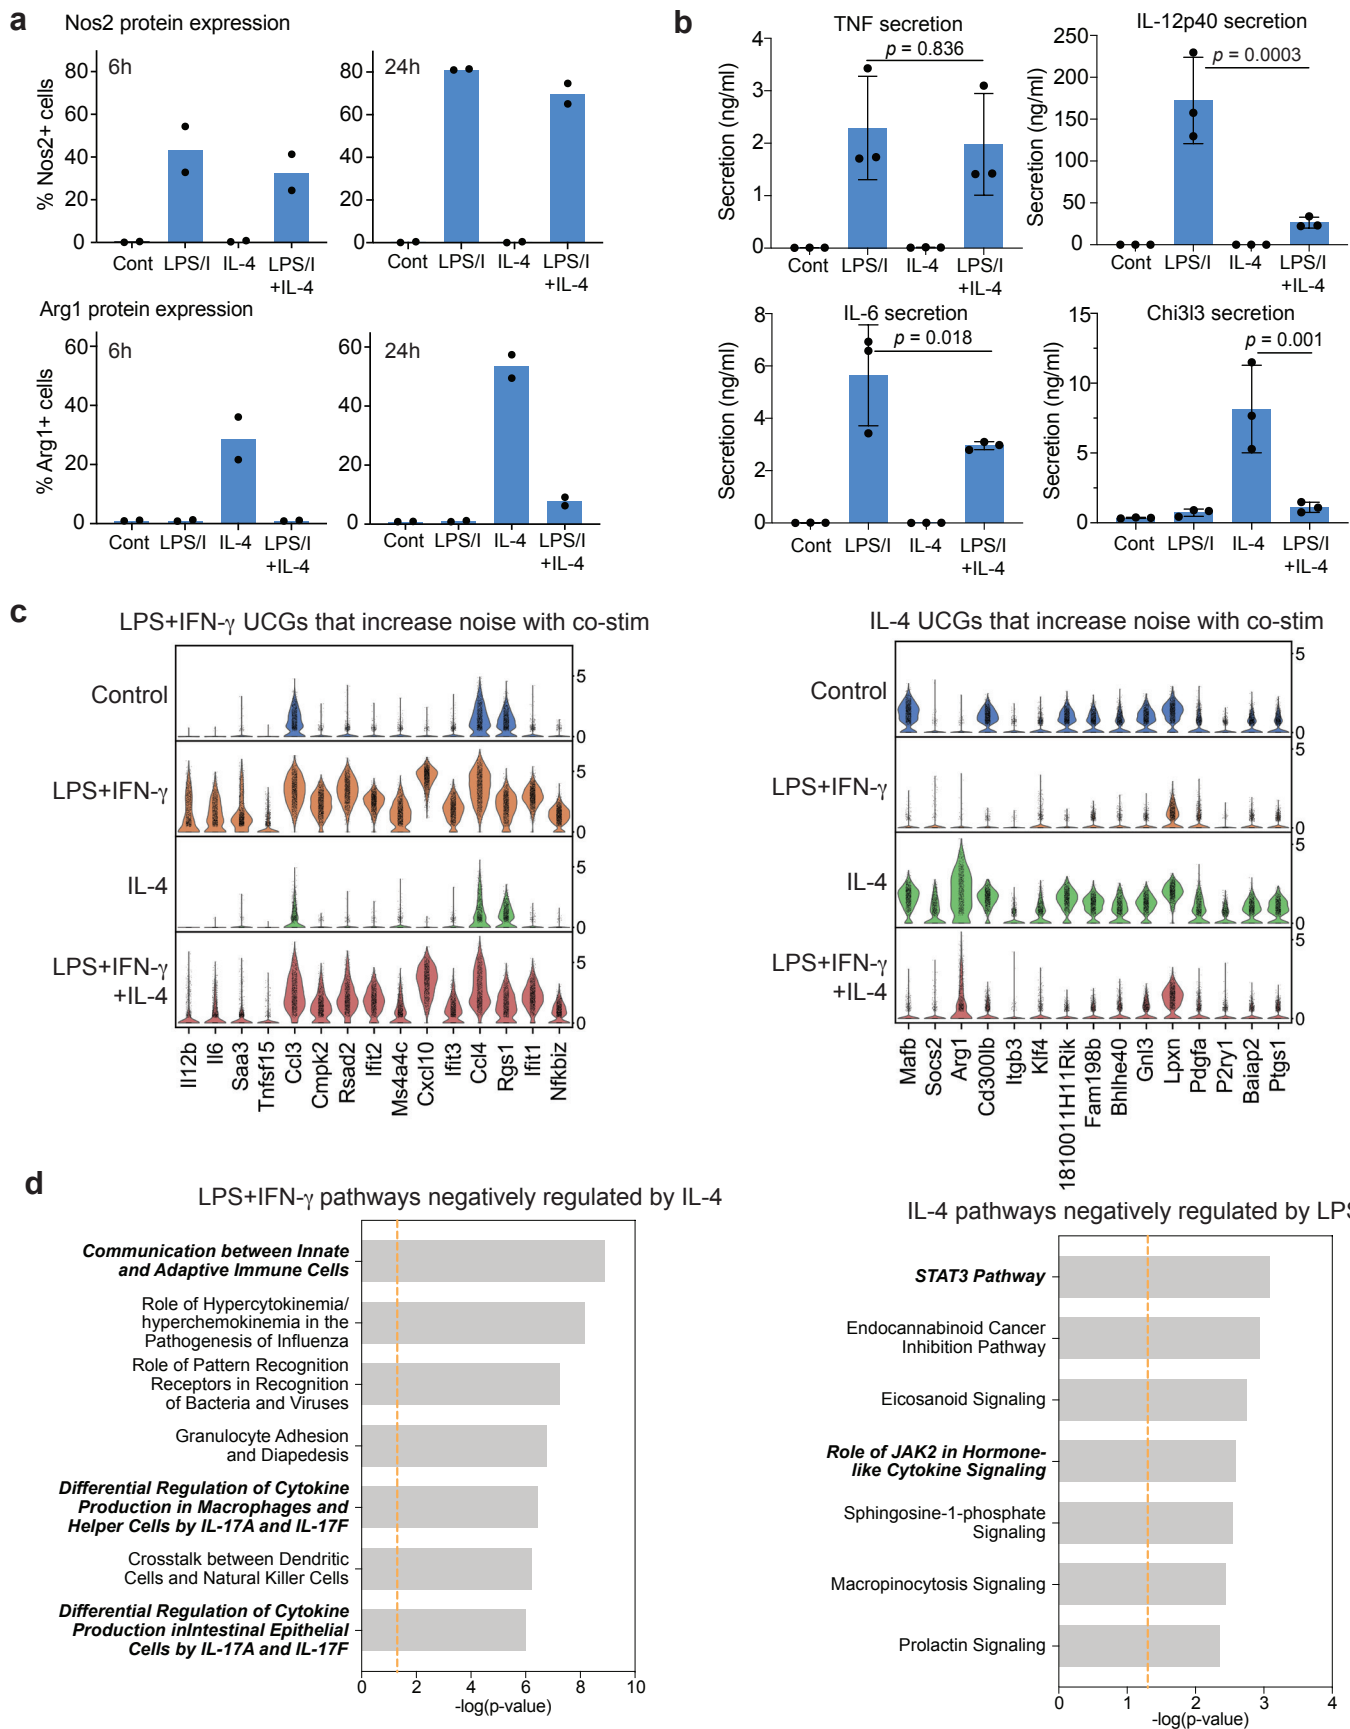

**Supplementary Fig. 2 (associated with Fig. 2). Cross-inhibition and cell-to-cell noise in gene expression after co-stimulation.**

**a** Levels of Nos2 (top) and Arg1 (bottom) protein detected by flow cytometry after stimulation for 6 h (left) and 24 h (right) with 10 ng/ml LPS+10 ng/ml IFN- $\gamma$ , 100 ng/ml IL-4, or the combination (mean,  $n=2$  biological replicates). **b** Levels of TNF, IL-12p40, IL-6 and Chi3l3 secretion after stimulation for 24 h with 10 ng/ml LPS+10 ng/ml IFN- $\gamma$ , 100 ng/ml IL-4, or the combination (mean  $\pm$  SEM,  $n=3$  biological replicates). P-values determined with two-sided one-way ANOVA with Sidak correction for multiple comparisons. **c** Violin plots of scRNA-seq measurements of LPS+IFN- $\gamma$ -induced (top) and IL-4-induced (bottom) genes with the highest change in cell-to-cell gene expression noise measured by Fano factor. **d** Result from Ingenuity Pathway Analysis listing the top 7 canonical pathways that are associated with the set of LPS+IFN- $\gamma$ -induced (top) or IL-4-induced (bottom) genes that are inhibited after co-stimulation. P-values indicate the significance of the overlap between the canonical pathway and the inhibited genes (determined by one-sided Fisher's exact test). Source data are provided as a Source Data file.

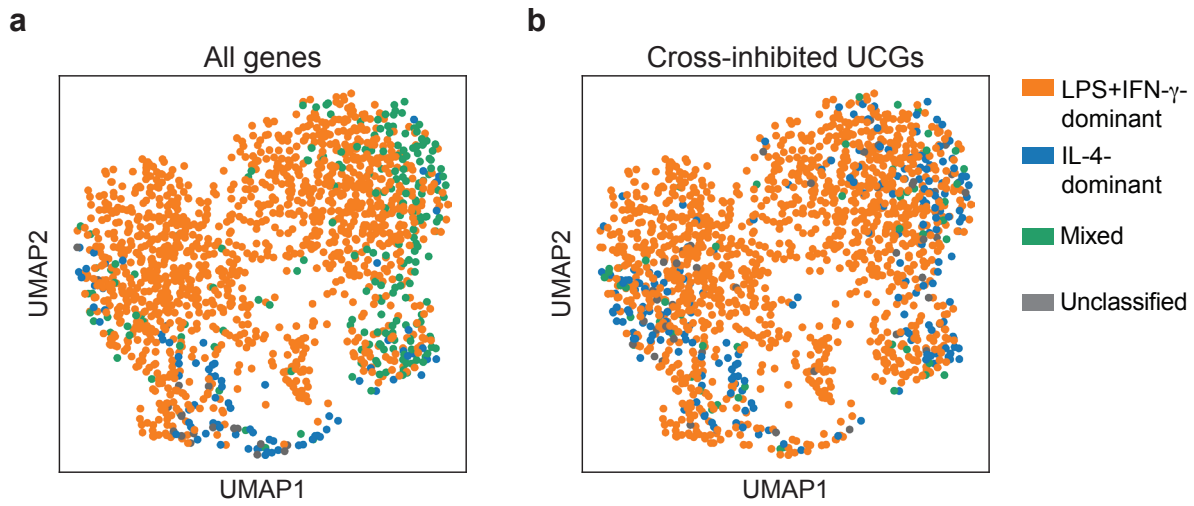

**Supplementary Fig. 3 (associated with Fig 3). Neural network classifier results identify clusters of mixed and single-stimuli-dominant cells. a-b** UMAP representation of classification results from the neural network classifier trained on all genes (**a**) or UCGs that displayed cross-inhibition after co-stimulation (**b**).

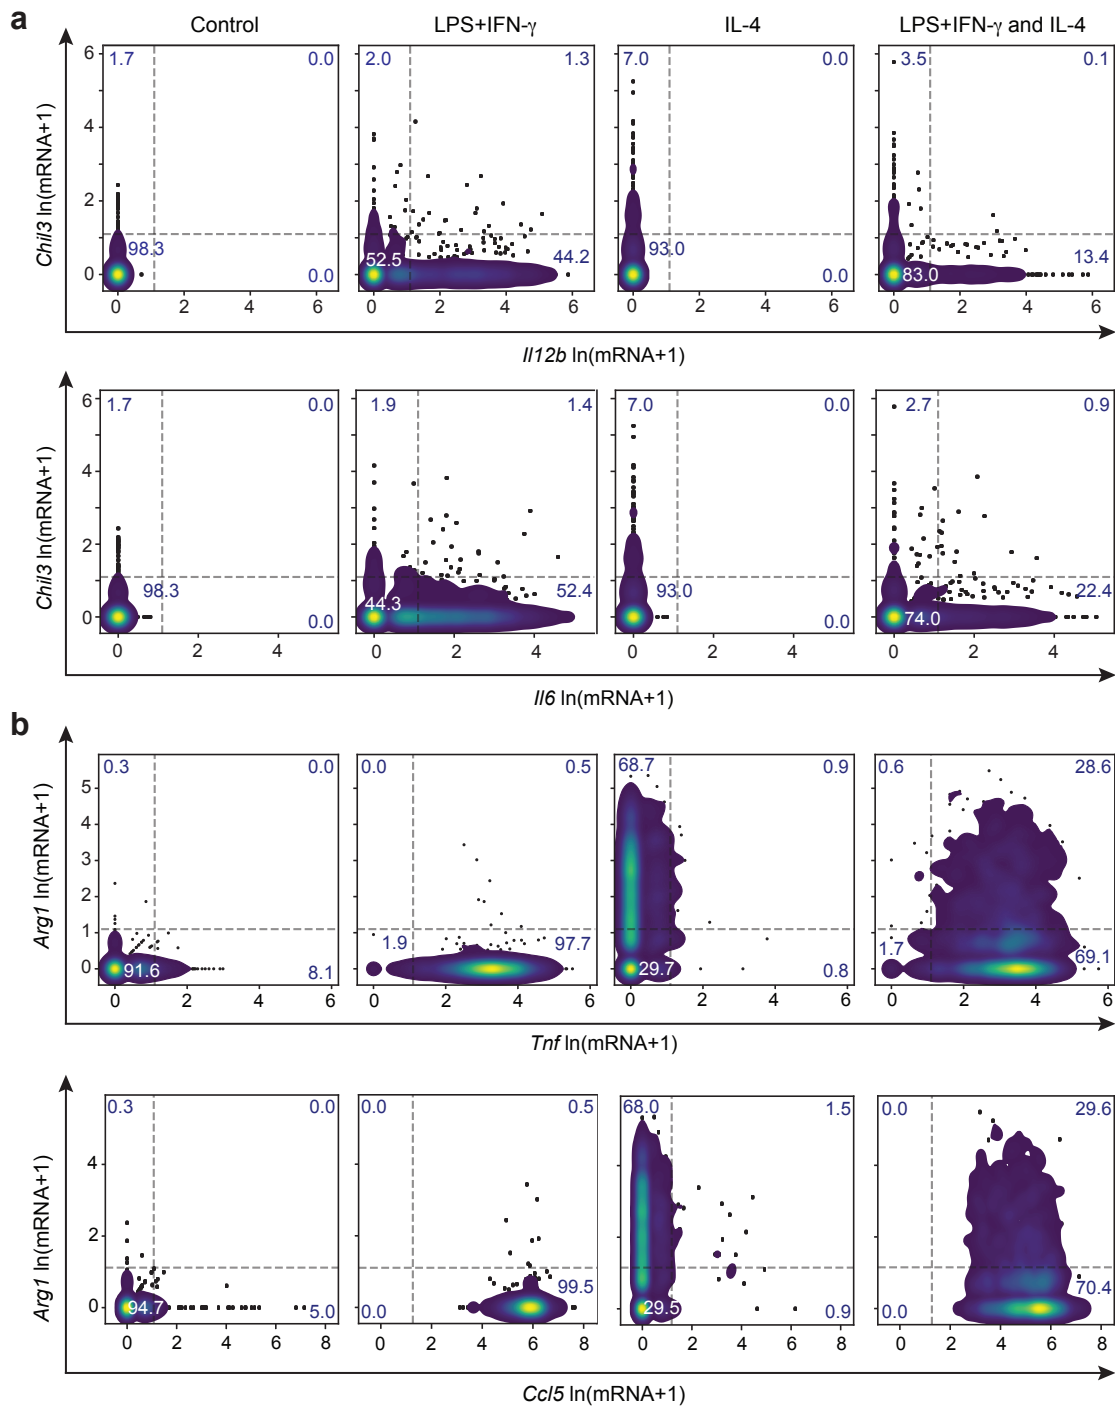

**Supplementary Fig. 4 (associated with Fig. 4). Orthogonal expression is observed for *Il6* and *Il12b* with *ChiI3* but not for *Tnf* and *Ccl5* with *Arg1*.** Density scatter plots of scRNA-seq transcript counts across individual cells for *ChiI3* vs. *Il12b* (**a**, top) and *Il6* (**a**, bottom); and for *Arg1* vs. *Tnf* (**b**, top) and *Ccl5* (**b**, bottom). Data is represented as  $\ln(\text{transcript count} + 1)$ .

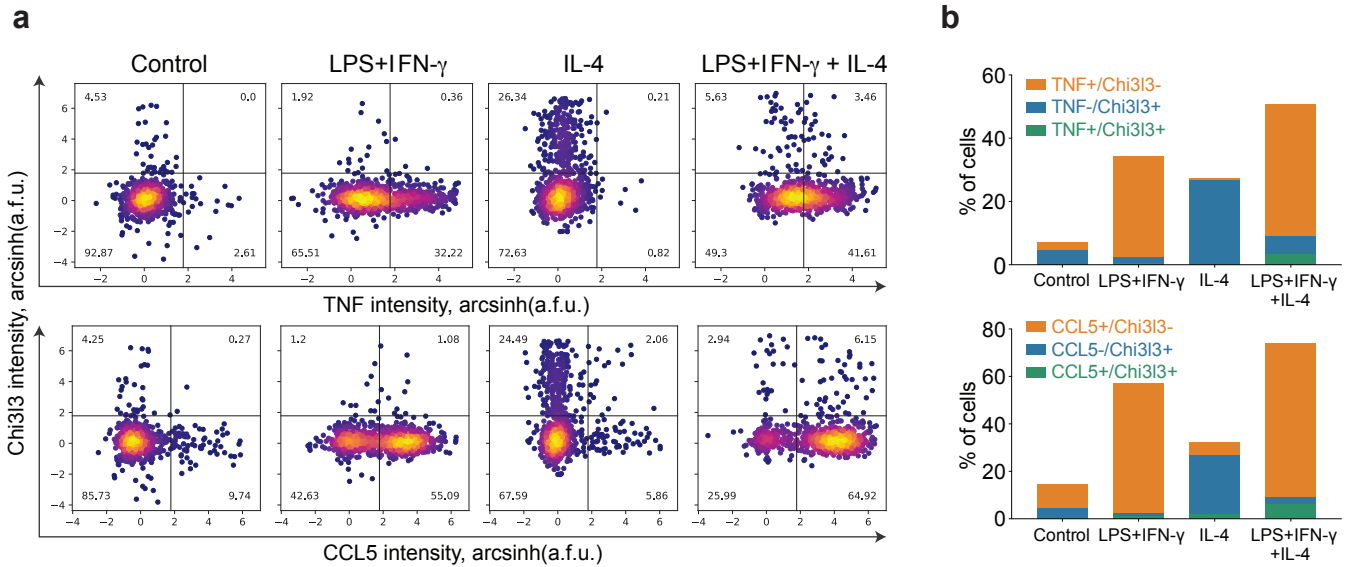

**Supplementary Fig. 5 (associated with Fig. 5). TNF and CCL5 are not orthogonally secreted with Chi3i3.** A multiplexed single-cell secretion assay was used to measure cytokine/chemokine production in individual BMDMs stimulated for 48 h with media alone, 10 ng/ml LPS+10ng/ml IFN- $\gamma$ , 100 ng/ml IL-4, or both. **a** Density scatter plots of single-cell secretion intensity (a.f.u.) across individual cells for Chi3i3 vs TNF (top) and Chi3i3 vs CCL5 (bottom). **b** Quantification of single-positive and double-positive cells after 48-hour co-stimulation for secretion of Chi3i3 and TNF (top) and Chi3i3 and CCL5 (bottom). Data is pooled from 2 biological replicates.

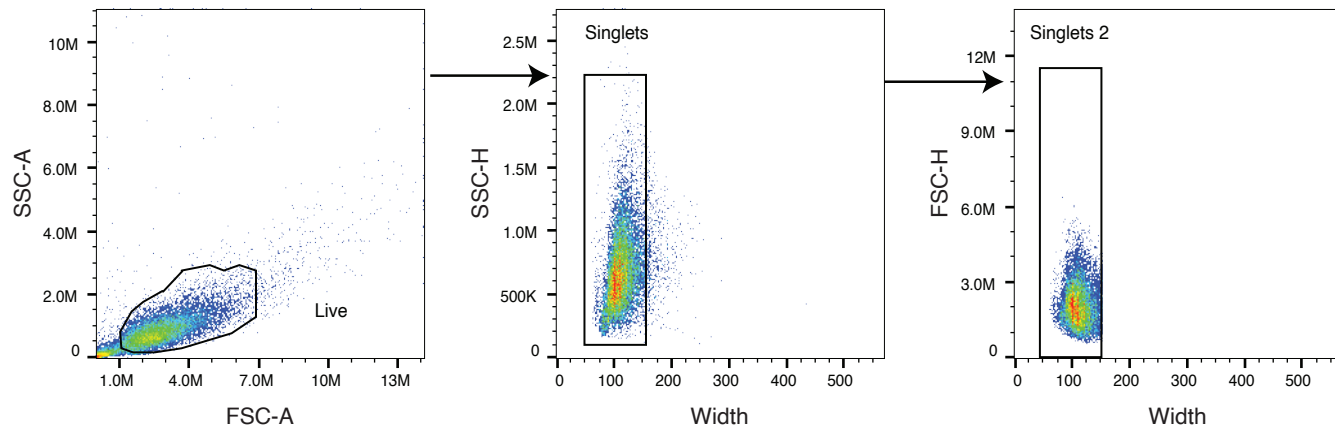

**Supplementary Fig. 6. Gating strategy for flow cytometry experiments.** Gating strategy for gating of live, singlet BMDMs.

**Supplementary Table 1. Capture and detection ELISA antibody pairs for secretion profiling.**

| <b>Antibody Pair</b> | <b>Vendor</b>  | <b>Catalog No.</b> |
|----------------------|----------------|--------------------|
| TNF                  | eBioscience    | 88-7324-88         |
| CCL17                | R&D            | DY529              |
| IL-12p40             | BD Biosciences | 555165             |
| IL-10                | BD Biosciences | 555252             |
| MMP9                 | R&D            | DY6718             |
| IL-6                 | R&D            | DY406              |
| IGF-I                | R&D            | DY791              |
| CCL2                 | R&D            | DY479              |
| CCL8                 | R&D            | DY790              |
| Chi3I3               | R&D            | DY2446             |
| CCL3                 | R&D            | DY450              |
| CXCL1                | R&D            | DY453              |
| GM-CSF               | R&D            | DY415              |
| CCL22                | R&D            | DY439              |
| CCL5                 | R&D            | DY478              |



**Supplementary Table 2. Primers used for qPCR.**

| <b>Target</b> | <b>Forward Primer (5' to 3')</b> | <b>Reverse Primer (5' to 3')</b> |
|---------------|----------------------------------|----------------------------------|
| <i>Nos2</i>   | GTTCTCAGCCCAACAATACAAGA          | GTGGACGGGTCGATGTCAC              |
| <i>Arg1</i>   | CTCCAAGCCAAAGTCCTTAGAG           | AGGAGCTGTCATTAGGGACATC           |
| <i>Klf4</i>   | GACTAACCGTTGGCGTGAGG             | GTCTAGGTCCAGGAGGTCGT             |
| <i>Nfkbiz</i> | GAGTCCCGTCCAGAGGTG               | ACTCTGTGTCTTAAACTCATCCAC         |
| <i>Il6</i>    | TCCTCTCTGCAAGAGACTTCC            | TTGTGAAGTAGGGAAGGCCG             |
| <i>Tnf</i>    | CCCTCACACTCAGATCATCTTCT          | GCTACGACGTGGGCTACAG              |
| <i>Il12b</i>  | CGCCACACAAATGGATGCAA             | TGTGTCCTGAGGTAGCCGTA             |
| <i>Chil3</i>  | CAGGTCTGGCAATTCTTCTGAA           | GTCTTGCTCATGTGTGTAAGTGA          |
| <i>Ubc</i>    | ACCACCAAGAAGGTCAAACAGG           | TAAGACACCTCCCCCATCAC             |
