# Supplementary material for: Co-stimulation with opposing macrophage polarization cues leads to orthogonal secretion programs in individual cells
Source: PubMed Central journal article supplement (PMC7804107; doi:10.1038/s41467-020-20540-2), 2021-01-12
Supplement: 41467_2020_20540_MOESM3_ESM.pdf [file 41467_2020_20540_MOESM3_ESM.pdf]

## **Descriptions of Additional Supplementary Files**

### **Supplementary Data 1**

**Description:** Associated with Fig. 1, Excel spreadsheet containing the list of upregulated and downregulated genes after stimulation with LPS+IFN- $\gamma$  or IL-4 compared to unstimulated cells.

### **Supplementary Data 2**

**Description:** associated with Fig. 5, Excel spreadsheet containing the intensity values of single-cell secretion data of macrophages stimulated for 48 hours with media alone, LPS+IFN- $\gamma$ , IL-4, or both.
